# Supplementary material for: Methylphosphonic acid as a 31P-NMR standard for the quantitative determination of phosphorus in carbonated beverages
Source: Royal Society of Chemistry journal article supplement (doi:10.1039/c3ay40743h), 2013-01-01
Supplement: c3ay40743h.pdf [file c3ay40743h.pdf]

# Methylphosphonic acid as a $^{31}\text{P}$ -NMR standard for the quantitative determination of phosphorus in carbonated beverages

Marek Kõllo, Marina Kudrjašova, Maria Kulp and Riina Aav\*

*Department of Chemistry, Faculty of Science, Tallinn University of Technology,*

*Tallinn, Akadeemia tee 15, 12618, Estonia*

*Email: riina@chemnet.ee*

## Supplementary Material

### Results of NMR measurements

#### Control of linearity

$\text{Na}_2\text{HPO}_4$  concentration compared to the area of  $\text{Na}_2\text{HPO}_4$  peak

| No. tube | $\text{Na}_2\text{HPO}_4$ concentration (mM) | Absolute area of peak |           |           | (Average absolute area $\pm$ STDEV*) $\times 10^3$ |
|----------|----------------------------------------------|-----------------------|-----------|-----------|----------------------------------------------------|
|          |                                              | Tube a                | Tube b    | Tube c    |                                                    |
| Exp1     | 2.4                                          | 68167.57              | 72975.51  | 66147.29  | $69 \pm 4$                                         |
| Exp2     | 3.4                                          | 83477.68              | 100989.00 | 101755.25 | $95 \pm 10$                                        |
| Exp3     | 4.5                                          | 114689.73             | 121459.03 | 118535.90 | $118 \pm 3$                                        |
| Exp4     | 6.2                                          | 153290.50             | 158894.07 | 161089.75 | $158 \pm 4$                                        |

\* - Standard deviation were calculated as follow:

$$STDEV = \sqrt{\frac{\sum (x_i - \bar{x})^2}{N-1}}, \text{ where } N-1 \text{ is number of degrees of freedom.}$$

MPA concentration compared to the area of MPA peak.

| No. tube | MPA concentration (mM) | Absolute area of peak <sup>a</sup> |           |           | (Average absolute area $\pm$ STDEV) $\times 10^3$ |
|----------|------------------------|------------------------------------|-----------|-----------|---------------------------------------------------|
|          |                        | Tube a                             | Tube b    | Tube c    |                                                   |
| Exp1     | 2.5                    | 65861.60                           | 70669.05  | 63260.26  | $67 \pm 4$                                        |
| Exp2     | 3.5                    | 83578.59                           | 93714.44  | 94217.83  | $91 \pm 6$                                        |
| Exp3     | 4.6                    | 123795.85                          | 126596.85 | 126794.95 | $126 \pm 2$                                       |
| Exp4     | 8.5                    | 210967.93                          | 205372.97 | 215921.98 | $211 \pm 5$                                       |

<sup>a</sup> Three parallels were separately prepared for every concentration.

## Control of linearity in soft drink (Coca-cola®)

MPA concentration compared to the area of MPA peak

| No. tube | MPA concentration (mM) | Absolute area of peak <sup>a</sup> |           |           | (Average absolute area ± STDEV) × 10 <sup>3</sup> |
|----------|------------------------|------------------------------------|-----------|-----------|---------------------------------------------------|
|          |                        | Tube a                             | Tube b    | Tube c    |                                                   |
| Exp5     | 0.1                    | 3205,204                           | 3352,175  | 3084,813  | 3.2 ± 0.1                                         |
| Exp6     | 0.5                    | 14474,365                          | 15739,012 | 15053,327 | 15.1 ± 0.6                                        |
| Exp7     | 1.1                    | 28174,86                           | 30917,80  | 31126,67  | 30 ± 2                                            |
| Exp8     | 2.1                    | 61977,50                           | 63773,71  | 65673,92  | 64 ± 2                                            |
| Exp9     | 4.2                    | 129294,75                          | 121292,99 | 124421,51 | 125 ± 4                                           |
| Exp10    | 6.3                    | 191689,26                          | 190250,07 | 193577,06 | 192 ± 2                                           |
| Exp11    | 8.4                    | 266910,70                          | 261903,08 | 255699,96 | 262 ± 6                                           |

<sup>a</sup> Three parallels were separately prepared for every concentration.

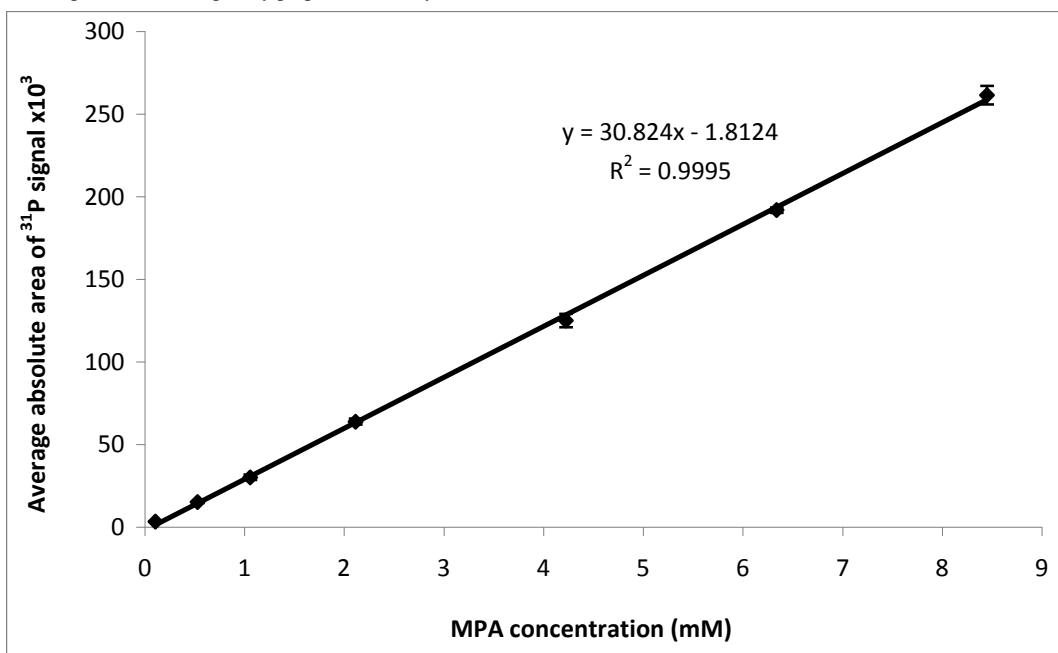

## NMR measurements of carbonated beverages

| <i>Cola 1</i> (with standard MPA concentration 7.0 mM in NMR tube) |                             |                              |                                 |                             |                              |                                 |
|--------------------------------------------------------------------|-----------------------------|------------------------------|---------------------------------|-----------------------------|------------------------------|---------------------------------|
| No. tube                                                           | 30° pulse angle             |                              |                                 | 90° pulse angle             |                              |                                 |
|                                                                    | Normalized area of standard | Normalized area of phosphate | Concentration of phosphate (mM) | Normalized area of standard | Normalized area of phosphate | Concentration of phosphate (mM) |
| Exp1 <sup>a</sup>                                                  | 1.86                        | 1.00                         | 5.68                            | 1.96                        | 1.00                         | 5.39                            |
| Exp2                                                               | 1.82                        | 1.00                         | 5.80                            | 1.93                        | 1.00                         | 5.47                            |
| Exp3                                                               | 1.86                        | 1.00                         | 5.68                            | 1.92                        | 1.00                         | 5.50                            |
| <b>Average (mM)</b>                                                |                             |                              | <b>5.7</b>                      | <b>Average (mM)</b>         |                              | <b>5.5</b>                      |
| <b>STDEV (mM)</b>                                                  |                             |                              | <b>0.1</b>                      | <b>STDEV (mM)</b>           |                              | <b>0.1</b>                      |

<sup>a</sup> Here and for following beverages three parallel samples were separately prepared (Exp 1, Exp 2, Exp 3).

| <i>Cola 2</i> (with standard MPA concentration 7.0 mM in NMR tube) |                             |                              |                                 |                             |                              |                                 |            |
|--------------------------------------------------------------------|-----------------------------|------------------------------|---------------------------------|-----------------------------|------------------------------|---------------------------------|------------|
| No. tube                                                           | 30° pulse angle             |                              |                                 | 90° pulse angle             |                              |                                 |            |
|                                                                    | Normalized area of standard | Normalized area of phosphate | Concentration of phosphate (mM) | Normalized area of standard | Normalized area of phosphate | Concentration of phosphate (mM) |            |
| Exp1                                                               | 1.78                        | 1.00                         | 5.93                            | 1.88                        | 1.00                         | 5.62                            |            |
| Exp2                                                               | 1.65                        | 1.00                         | 6.40                            | 1.75                        | 1.00                         | 6.04                            |            |
| Exp3                                                               | 1.81                        | 1.00                         | 5.84                            | 1.91                        | 1.00                         | 5.53                            |            |
| <b>Average (mM)</b>                                                |                             |                              | <b>6.1</b>                      | <b>Average (mM)</b>         |                              |                                 | <b>5.7</b> |
| <b>STDEV (mM)</b>                                                  |                             |                              | <b>0.3</b>                      | <b>STDEV (mM)</b>           |                              |                                 | <b>0.3</b> |

| <i>Coca-Cola Zero</i> (with standard MPA concentration 7.0 mM in NMR tube) |                             |                              |                                 |                             |                              |                                 |            |
|----------------------------------------------------------------------------|-----------------------------|------------------------------|---------------------------------|-----------------------------|------------------------------|---------------------------------|------------|
| No. tube                                                                   | 30° pulse angle             |                              |                                 | 90° pulse angle             |                              |                                 |            |
|                                                                            | Normalized area of standard | Normalized area of phosphate | Concentration of phosphate (mM) | Normalized area of standard | Normalized area of phosphate | Concentration of phosphate (mM) |            |
| Exp1                                                                       | 2.23                        | 1.00                         | 4.74                            | 2.31                        | 1.00                         | 4.57                            |            |
| Exp2                                                                       | 2.24                        | 1.00                         | 4.72                            | 2.40                        | 1.00                         | 4.40                            |            |
| Exp3                                                                       | 2.28                        | 1.00                         | 4.63                            | 2.39                        | 1.00                         | 4.42                            |            |
| <b>Average (mM)</b>                                                        |                             |                              | <b>4.7</b>                      | <b>Average (mM)</b>         |                              |                                 | <b>4.5</b> |
| <b>STDEV (mM)</b>                                                          |                             |                              | <b>0.1</b>                      | <b>STDEV (mM)</b>           |                              |                                 | <b>0.1</b> |

| <i>Pepsi 1</i> (with standard MPA concentration 7.0 mM in NMR tube) |                             |                              |                                 |                             |                              |                                 |            |
|---------------------------------------------------------------------|-----------------------------|------------------------------|---------------------------------|-----------------------------|------------------------------|---------------------------------|------------|
| No. tube                                                            | 30° pulse angle             |                              |                                 | 90° pulse angle             |                              |                                 |            |
|                                                                     | Normalized area of standard | Normalized area of phosphate | Concentration of phosphate (mM) | Normalized area of standard | Normalized area of phosphate | Concentration of phosphate (mM) |            |
| Exp1                                                                | 1.86                        | 1.00                         | 5.68                            | 1.77                        | 1.00                         | 5.97                            |            |
| Exp2                                                                | 1.99                        | 1.00                         | 5.31                            | 2.00                        | 1.00                         | 5.28                            |            |
| Exp3                                                                | 2.05                        | 1.00                         | 5.15                            | 2.08                        | 1.00                         | 5.08                            |            |
| <b>Average (mM)</b>                                                 |                             |                              | <b>5.4</b>                      | <b>Average (mM)</b>         |                              |                                 | <b>5.4</b> |
| <b>STDEV (mM)</b>                                                   |                             |                              | <b>0.3</b>                      | <b>STDEV (mM)</b>           |                              |                                 | <b>0.5</b> |

| <i>Dr. Pepper</i> (with standard MPA concentration 7.0 mM in NMR tube) |                             |                              |                                 |                             |                              |                                 |            |
|------------------------------------------------------------------------|-----------------------------|------------------------------|---------------------------------|-----------------------------|------------------------------|---------------------------------|------------|
| No. tube                                                               | 30° pulse angle             |                              |                                 | 90° pulse angle             |                              |                                 |            |
|                                                                        | Normalized area of standard | Normalized area of phosphate | Concentration of phosphate (mM) | Normalized area of standard | Normalized area of phosphate | Concentration of phosphate (mM) |            |
| Exp1                                                                   | 2.97                        | 1.00                         | 3.56                            | 2.96                        | 1.00                         | 3.57                            |            |
| Exp2                                                                   | 3.04                        | 1.00                         | 3.47                            | 3.09                        | 1.00                         | 3.42                            |            |
| Exp3                                                                   | 2.94                        | 1.00                         | 3.59                            | 3.06                        | 1.00                         | 3.45                            |            |
| <b>Average (mM)</b>                                                    |                             |                              | <b>3.5</b>                      | <b>Average (mM)</b>         |                              |                                 | <b>3.5</b> |
| <b>STDEV (mM)</b>                                                      |                             |                              | <b>0.1</b>                      | <b>STDEV (mM)</b>           |                              |                                 | <b>0.1</b> |

| <i>Coca-Cola</i> (with standard MPA concentration 7.1 mM in NMR tube) |                             |                              |                                 |
|-----------------------------------------------------------------------|-----------------------------|------------------------------|---------------------------------|
| No. tube                                                              | Normalized area of standard | Normalized area of phosphate | Concentration of phosphate (mM) |
| Exp1                                                                  | 1.80                        | 1.00                         | 5.91                            |
| Exp2                                                                  | 1.69                        | 1.00                         | 6.30                            |
| Exp3                                                                  | 1.90                        | 1.00                         | 5.60                            |
| <b>Average (mM)</b>                                                   |                             |                              | <b>5.9</b>                      |
| <b>STDEV (mM)</b>                                                     |                             |                              | <b>0.3</b>                      |

| <i>Coca-Cola Light</i> (with standard MPA concentration 7.1 mM in NMR tube) |                             |                              |                                 |
|-----------------------------------------------------------------------------|-----------------------------|------------------------------|---------------------------------|
| No. tube                                                                    | Normalized area of standard | Normalized area of phosphate | Concentration of phosphate (mM) |
| Exp1                                                                        | 2.30                        | 1.00                         | 4.63                            |
| Exp2                                                                        | 2.32                        | 1.00                         | 4.59                            |
| Exp3                                                                        | 2.11                        | 1.00                         | 5.05                            |
| <b>Average (mM)</b>                                                         |                             |                              | <b>4.8</b>                      |
| <b>STDEV (mM)</b>                                                           |                             |                              | <b>0.3</b>                      |

| <i>Pepsi 2</i> (with standard MPA concentration 7.1 mM in NMR tube) |                             |                              |                                 |
|---------------------------------------------------------------------|-----------------------------|------------------------------|---------------------------------|
| No. tube                                                            | Normalized area of standard | Normalized area of phosphate | Concentration of phosphate (mM) |
| Exp1                                                                | 1.83                        | 1.00                         | 5.82                            |
| Exp2                                                                | 1.77                        | 1.00                         | 6.01                            |
| Exp3                                                                | 1.65                        | 1.00                         | 6.45                            |
| <b>Average (mM)</b>                                                 |                             |                              | <b>6.1</b>                      |
| <b>STDEV (mM)</b>                                                   |                             |                              | <b>0.3</b>                      |

| <i>Angry Birds Tropic Cola</i> (with standard MPA concentration 7.1 mM in NMR tube) |                             |                              |                                 |
|-------------------------------------------------------------------------------------|-----------------------------|------------------------------|---------------------------------|
| No. tube                                                                            | Normalized area of standard | Normalized area of phosphate | Concentration of phosphate (mM) |
| Exp1                                                                                | 2.36                        | 1.00                         | 4.51                            |
| Exp2                                                                                | 2.02                        | 1.00                         | 5.27                            |
| Exp3                                                                                | 2.00                        | 1.00                         | 5.32                            |
| <b>Average (mM)</b>                                                                 |                             |                              | <b>5.0</b>                      |
| <b>STDEV (mM)</b>                                                                   |                             |                              | <b>0.5</b>                      |

| <i>RC Cola</i> (with standard MPA concentration 7.1 mM in NMR tube) |                             |                              |                                 |
|---------------------------------------------------------------------|-----------------------------|------------------------------|---------------------------------|
| No. tube                                                            | Normalized area of standard | Normalized area of phosphate | Concentration of phosphate (mM) |
| Exp1. #1 <sup>a</sup>                                               | 2.38                        | 1.00                         | 4.47                            |
| Exp1. #2                                                            | 2.48                        | 1.00                         | 4.29                            |
| Exp1. #3                                                            | 2.39                        | 1.00                         | 4.45                            |
| Exp2                                                                | 2.39                        | 1.00                         | 4.45                            |
| Exp3                                                                | 2.35                        | 1.00                         | 4.53                            |
| <b>Average (mM)</b>                                                 |                             |                              | <b>4.4</b>                      |

**STDEV (mM)                      0.1**

<sup>a</sup> Sample 1 was measured 3 times.

Absolute area of <sup>31</sup>P-NMR signal of 0.70 mM MPA in different cola matrixes measured with 30° and 90° pulse angle.

| Beverage        | 30° pulse angle |           |                                     | 90° pulse angle |           |                                     |
|-----------------|-----------------|-----------|-------------------------------------|-----------------|-----------|-------------------------------------|
|                 |                 |           | (Average ± STDEV) × 10 <sup>4</sup> |                 |           | (Average ± STDEV) × 10 <sup>4</sup> |
| Cola 1®         | Exp1            | 91907,38  | 9.5 ± 0.3                           | Exp1            | 202754,38 | 21.2 ± 0.8                          |
|                 | Exp2            | 95956,23  |                                     | Exp2            | 217199,16 |                                     |
|                 | Exp3            | 98624,55  |                                     | Exp3            | 214725,02 |                                     |
| Cola 2®         | Exp1            | 96832,08  | 9.3 ± 0.4                           | Exp1            | 217810,74 | 20.8 ± 0.9                          |
|                 | Exp2            | 91597,81  |                                     | Exp2            | 200467,04 |                                     |
|                 | Exp3            | 89899,00  |                                     | Exp3            | 205669,34 |                                     |
| Coca-Cola Zero® | Exp1            | 89984,13  | 8.9 ± 0.3                           | Exp1            | 193595,17 | 19.8 ± 0.7                          |
|                 | Exp2            | 85937,87  |                                     | Exp2            | 193361,88 |                                     |
|                 | Exp3            | 91565,30  |                                     | Exp3            | 206289,31 |                                     |
| Pepsi®          | Exp1            | 85909,49  | 9.3 ± 0.7                           | Exp1            | 188497,84 | 21 ± 2                              |
|                 | Exp2            | 99046,92  |                                     | Exp2            | 219779,94 |                                     |
|                 | Exp3            | 94881,34  |                                     | Exp3            | 209720,66 |                                     |
| Dr.Pepper®      | Exp1            | 95004,14  | 9.7 ± 0.4                           | Exp1            | 208196,93 | 21.0 ± 0.5                          |
|                 | Exp2            | 102162,09 |                                     | Exp2            | 214822,85 |                                     |
|                 | Exp3            | 95279,84  |                                     | Exp3            | 206039,50 |                                     |

Results of spectrometric analysis<sup>a</sup>.

| Beverage        | Concentration of phosphate, mgP/l (three parallels) |     |     |
|-----------------|-----------------------------------------------------|-----|-----|
| Cola 1®         | 171                                                 | 173 | 173 |
| Cola 2®         | 171                                                 | 174 | 172 |
| Coca-Cola Zero® | 150                                                 | 148 | 148 |
| Pepsi®          | 169                                                 | 173 | 173 |
| Dr.Pepper®      | 116                                                 | 114 | 112 |

<sup>a</sup> Determined by EVS-EN ISO 6878, sec 4 in accredited Central Lab of Estonian Environmental Research Centre
